# Supplementary material for: Rapid and sensitive electrochemiluminescence detection using easily fabricated sensor with an integrated two-electrode system
Source: Royal Society of Chemistry journal article supplement (doi:10.1039/d3ra07298c), 2024-01-01
Supplement: d3ra07298c1.pdf [file d3ra07298c1.pdf]

# Supplementary Material

**Table S1.** Relevant parameters of five PVD microchips.

| Structure No. | Type | Electrode system | Working electrode size* | The area of Working electrode | Distance* | Microchip size |
|---------------|------|------------------|-------------------------|-------------------------------|-----------|----------------|
| #8            | PVD  | Two-electrode    | R=1.5 mm                | 7.065 mm <sup>2</sup>         | D=750 μm  | 12 mm×45 mm    |
| #9            | PVD  | Two-electrode    | R=1.5 mm                | 7.065 mm <sup>2</sup>         | D=200 μm  | 12 mm×45 mm    |
| #10           | PVD  | Two-electrode    | R=900 μm                | 2.543 mm <sup>2</sup>         | D=350 μm  | 13 mm×13 mm    |
| #11           | PVD  | Two-electrode    | R=900 μm                | 2.543 mm <sup>2</sup>         | D=500 μm  | 13 mm×13 mm    |
| #12           | PVD  | Two-electrode    | R=900 μm                | 2.543 mm <sup>2</sup>         | D=750 μm  | 13 mm×13 mm    |

\* R means the radius of circular electrode. D means the distance between working electrode and counter electrode.

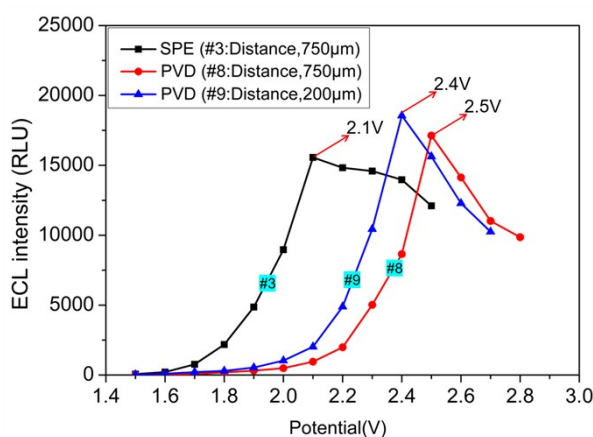

**Fig. S1.** ECL intensity from 0.1 μM Ru(bpy)<sub>3</sub><sup>2+</sup> and 30 mM TPrA in PBS solution (0.01 M, pH 7.0), achieved in SPE and PVD microchips with a 1500-μm radius of WE. Labeled value represents the distance between the counter electrode and working electrode for each microchip. The dots in each line represent ECL intensity during the measurement under different TP in the range of 1.5 V to 2.8 V.

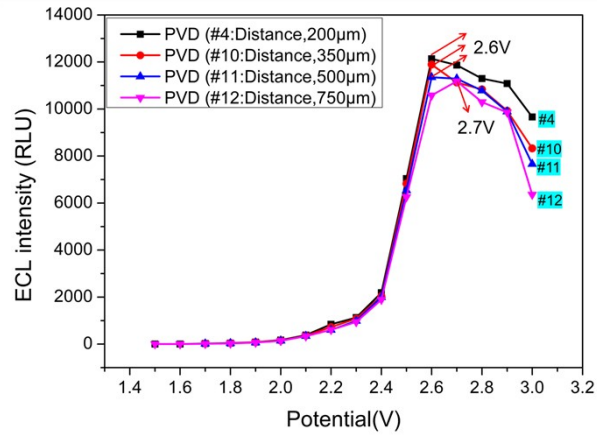

**Fig. S2.** ECL intensity from  $0.1 \mu\text{M Ru}(\text{bpy})_3^{2+}$  and  $30 \text{ mM TPrA}$  in PBS solution ( $0.01 \text{ M}$ ,  $\text{pH } 7.0$ ), achieved in PVD microchips with identical WE area (a  $900\text{-}\mu\text{m}$  radius of WE) and different distance between WE and CE. The dots in each line represent ECL intensity during the measurement under different TP in the range of  $1.5 \text{ V}$  to  $3.0 \text{ V}$ .

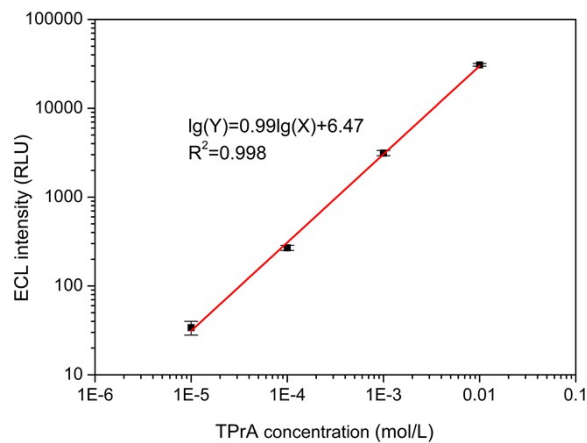

**Fig. S3.** Calibration plots for the TPrA determination using PVD chip (#4) with a  $900\text{-}\mu\text{m}$  radius of WE. The buffer is  $0.01 \text{ M}$  PBS solution, and the concentration of  $\text{Ru}(\text{bpy})_3^{2+}$  was  $10 \mu\text{M}$ . Five replicate measurements were performed for all devices. Data were reported as average  $\pm$  standard deviation. The X and Y axes were in a logarithmic scale to obtain a more condensed graphical representation.
